# Supplementary material for: The Genetic Selection of HSPD1 and HSPE1 Reduce Inflammation of Liver and Spleen While Restraining the Growth and Development of Skeletal Muscle in Wuzhishan Pigs
Source: MDPI journal article supplement (doi:10.3390/ani14010174), 2024-01-04
Supplement: s1 [file s1]

## Supplementary Figures

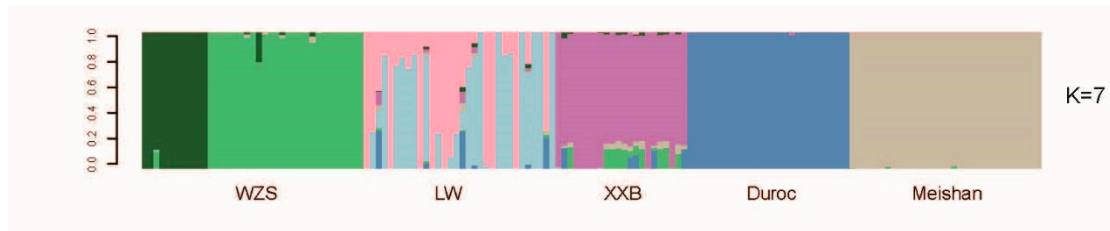

**Figure S1.** The optimal number  $K=7$  of the population structure

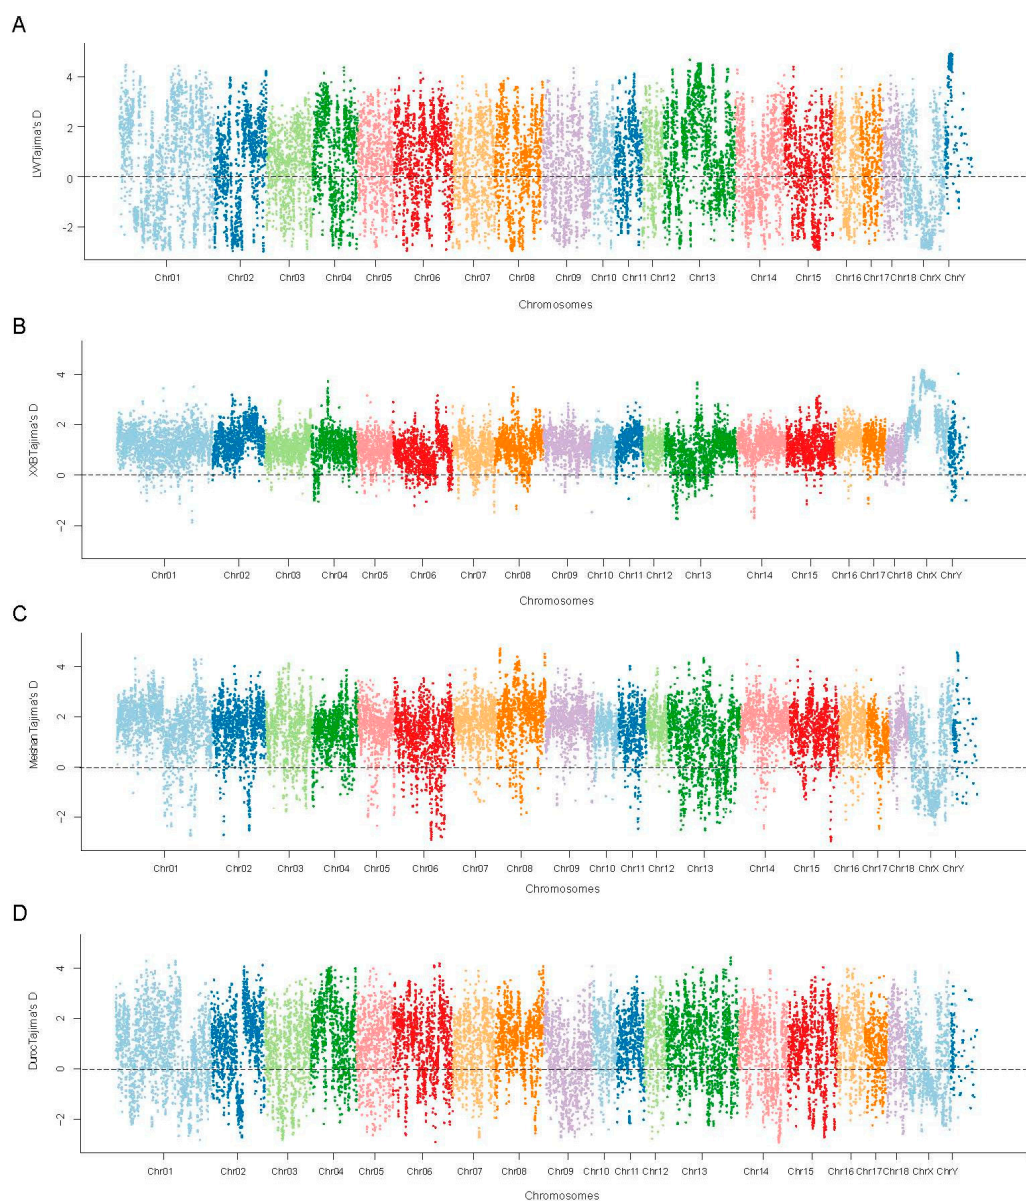

**Figure S2.** The Tajima's  $D$  distribution on the chromosomes of four pig populations. (A) LW. (B) XXB. (C) Meishan. (D) Duroc.

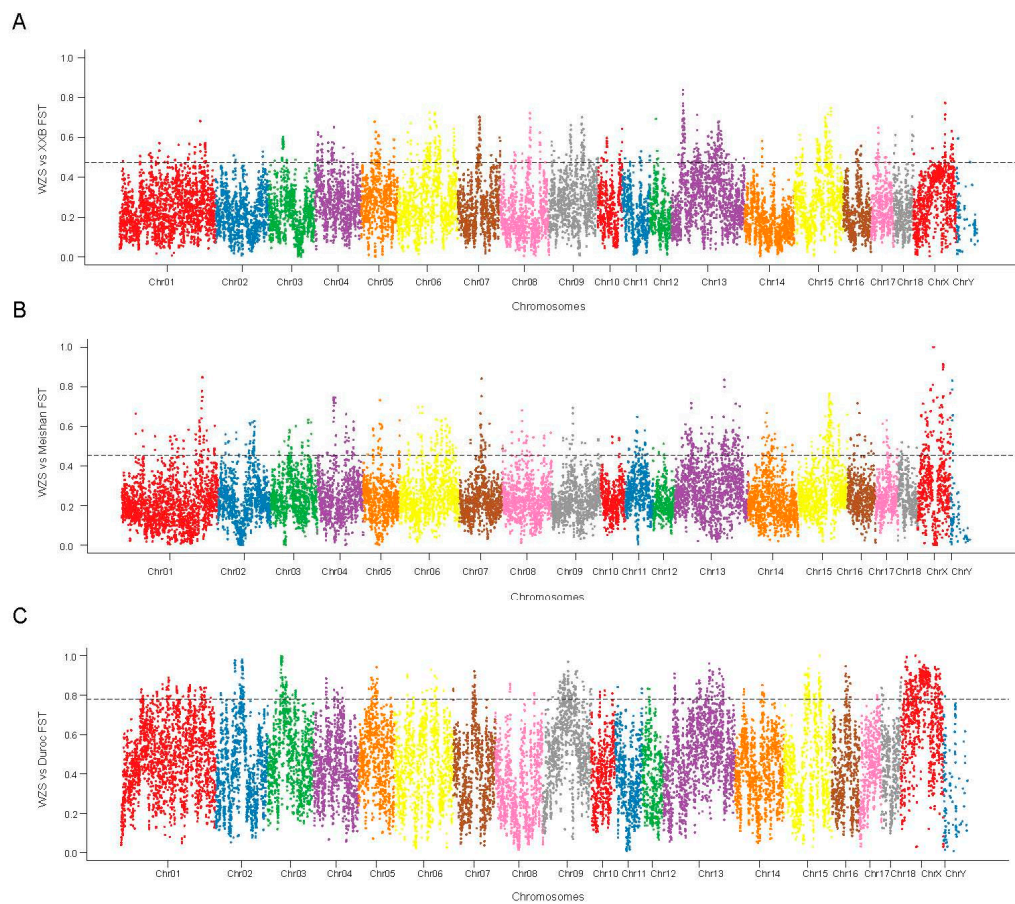

**Figure S3.** The  $F_{ST}$  distribution on the chromosomes between WZS pigs and other pigs. **(A)** WZS and XXB. **(B)** WZS and Meishan. **(C)** WZS and Duroc.

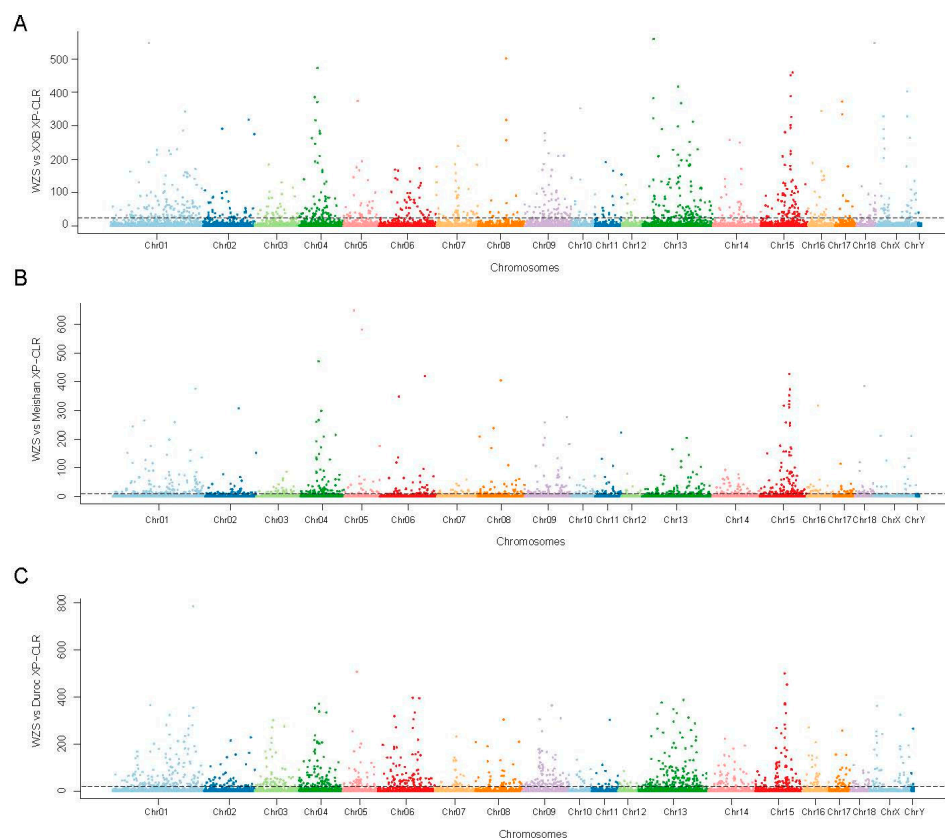

**Figure S4.** The XP-CLR distribution on the chromosomes between WZS pigs and other pigs. **(A)** WZS and XXB. **(B)** WZS and Meishan. **(C)** WZS and Duroc.

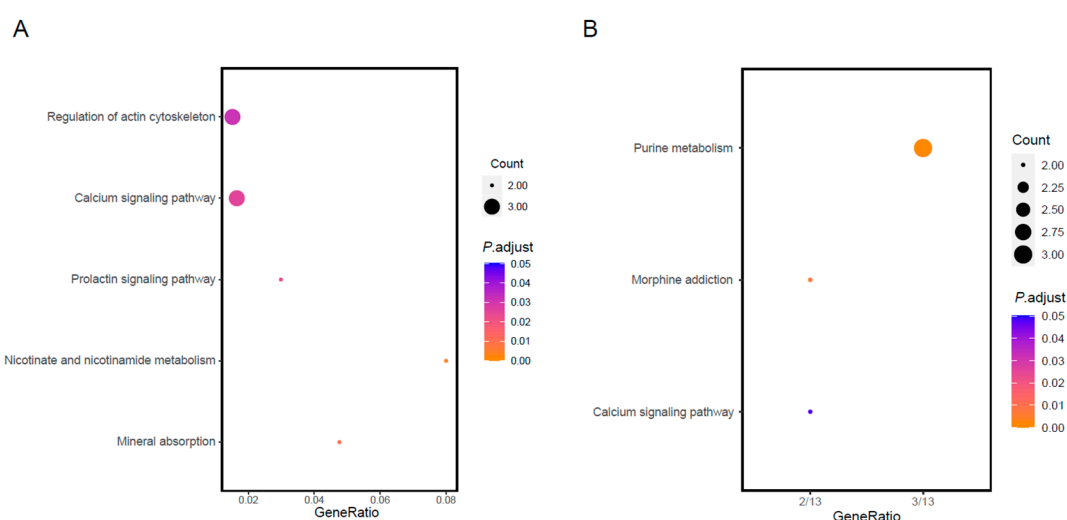

**Figure S5.** The KEGG enrichment of the top 5% genetic area between WZS and other pigs. **(A)** WZS and Meishan. **(B)** WZS and Duroc.
