# Supplementary material for: The Genetic Selection of HSPD1 and HSPE1 Reduce Inflammation of Liver and Spleen While Restraining the Growth and Development of Skeletal Muscle in Wuzhishan Pigs
Source: Animals (Basel). 2024 Jan 4;14(1):174. doi: 10.3390/ani14010174 (PMC10777996; doi:10.3390/ani14010174)
Supplement: Supplementary file 1 [file animals-14-00174-s001.zip › Supplementary tables-revisions.xls]

## Sheet: Table S1
Supplementary Table S1: The weight values of three WZS pigs and three LW pigs used for RNA-seq
Samples	Weight/kg
WZS1	13.8
WZS2	14.2
WZS3	14.5
LW1	57.4
LW2	58.1
LW3	58.6

## Sheet: Table S2
Supplementary Table S2: The primers of RT-QPCR for 12 genes.
Genes	Primer sequences(5'-3')	Product length (bp)
HSPD1-F	TAGCTGTGCTGAAGGTTGGT	151
HSPD1-R	AAGGCTGGAATGCACCGAAG
HSPE1-F	AACGGTAACCAAAGGAGGCAT	115
HSPE1-R	TGGTTGAATCTCTCCACCCT
STAT1-F	GGGCTCTGCTAAAGGACCAG	120
STAT1-R	AGTAAGGTTCGCCTCCGTTC
STAT4-F	ACCTGCTCATTACCTGTGGTG	169
STAT4-R	ACTGCCAGCTCATCACTTCT
STAT2-F	TGAGGGACAAGCTGTTTGGG	117
STAT2-R	TGTCCAGCCATGTCCAGAAC
JAK3-F	GTCAAGTACCGGGGTGTCAG	172
JAK3-R	CCAGGTACTCCATGCCCTTG
TICAM1-F	GAACCCGAGGAGATGAGCTG	150
TICAM1-R	TGTGCTGGTTTCTGGAGCTT
RACK1-F	AACCAATCACATCGGCCACA	147
RACK1-R	TCCCCACCATCTAGCGTGTA
TIMM13-F	CATGGAGCAGGTGAAAGTGC	124
TIMM13-R	CTGCTCCGAATTGTCCAAGG
CD14-F	GTTCTCCCGCCTCAAGGAAC	110
CD14-R	TACGGAGTCTGAGGGTGGTG
IGF1-F	TCGTGGATGAGTGCTGCTTC	130
IGF1-R	TTCTGAGCCTTGGGCATGT
RUNX2-F	TTTCAGACCCCAGGCAGTTC	131
RUNX2-R	GGACATACCGAGGGACATGC
GAPDH-F	CGTGTCGGTTGTGGATCTGA	118
GAPDH-R	CTCAGTGTAGCCCAGGATGC
ACTB-F	CCGACAGGATGCAGAAGGAG	137
ACTB-R	CATCTGCTGGAAGGTGGACA

## Sheet: Table S3
Supplementary Table S3: Summary information of different breeds of pigs in this study
Number of popultions	Geographic regions	Sampling locations	Species/ populations	Codes	Individuals' ID	Sequencing depth	Coverage (%)	Mapping rate (%)	Raw Base (BP)	Clean Base	No. of clean reads	Q20 (%)	Q30 (%)	GC (%)
1	Hainan	Chengmai	Wuzhishan	WZS	B12	10.9366	93	97.32	27362513400	27222205500	173677776	96.75	91.64	40.33
1	Hainan	Chengmai	Wuzhishan	WZS	B18	11.7163	92.68	96.81	29313180000	29124975000	185958612	96.53	91.14	42.73
1	Hainan	Chengmai	Wuzhishan	WZS	B24	11.8446	94.28	97.15	29634106800	29460071100	190276990	97.31	93.1	42.43
1	Hainan	Chengmai	Wuzhishan	WZS	B25	10.89	93.75	97.35	27245833200	27126124800	173825082	97.15	92.48	40.05
1	Hainan	Chengmai	Wuzhishan	WZS	B27	10.9703	93.24	97.21	27446619600	27267592800	174907558	96.8	91.7	42.95
1	Hainan	Chengmai	Wuzhishan	WZS	B28	11.1996	91.93	96.79	28020516600	27769960500	176425380	96.55	91.58	42.91
1	Hainan	Chengmai	Wuzhishan	WZS	B30	10.3811	94.02	97.37	25972695900	25860105900	166081790	97.31	92.86	41.29
1	Hainan	Chengmai	Wuzhishan	WZS	B32	11.095	94.64	97.42	27758773500	27612312300	178698640	97.53	93.43	42.13
1	Hainan	Chengmai	Wuzhishan	WZS	B37	10.5559	94.52	97.41	26409979800	26260253100	169766048	97.45	93.25	42.5
1	Hainan	Chengmai	Wuzhishan	WZS	B4	10.5207	93.71	96.93	26321834700	26186399700	167938588	97.17	92.57	41.6
1	Hainan	Chengmai	Wuzhishan	WZS	B8	10.72	90.81	94.34	26820449400	26456484900	168336638	96.34	90.94	47.04
1	Hainan	Chengmai	Wuzhishan	WZS	H10	11.3319	96.77	96.86	28351492800	28196050200	118119883	97.25	92.77	41.62
1	Hainan	Chengmai	Wuzhishan	WZS	H12	10.7859	93.6	97.49	26985313200	26846648100	172052042	97.1	92.43	41.11
1	Hainan	Chengmai	Wuzhishan	WZS	H13	10.7215	93.59	96.54	26824248900	26667083100	170981548	97.14	92.53	41.97
1	Hainan	Chengmai	Wuzhishan	WZS	H14	10.4692	94.25	96.75	26193009600	26020741200	168073236	97.43	93.28	43.03
1	Hainan	Chengmai	Wuzhishan	WZS	H4	11.5028	93.73	97.38	28778925300	28624095000	183824354	97.1	92.32	40.27
1	Hainan	Chengmai	Wuzhishan	WZS	H6	11.6758	94.61	97.21	29211858600	29043683400	188023850	97.52	93.4	42.03
1	Hainan	Chengmai	Wuzhishan	WZS	H7	10.2048	93.67	97.13	25531483500	25404841800	162853772	97.12	92.44	41.11
1	Hainan	Chengmai	Wuzhishan	WZS	H9	10.4166	93.76	97.65	26061334200	25925827200	166875993	96.82	91.85	41.7
1	Hainan	Chengmai	Wuzhishan	WZS	W12	10.9008	92.51	97.36	27272959500	27098928900	172727270	96.43	90.92	42.77
1	Hainan	Chengmai	Wuzhishan	WZS	W16	10.564	93.68	96.72	26430197100	26266820700	168590826	97.2	92.69	42.12
1	Hainan	Chengmai	Wuzhishan	WZS	W17	11.1144	93.73	97.13	27807278100	27658143900	177574536	97.12	92.41	41.09
1	Hainan	Chengmai	Wuzhishan	WZS	W18	11.2163	93.3	97.85	28062118800	27939457500	178499616	96.87	91.89	40.84
1	Hainan	Chengmai	Wuzhishan	WZS	W20	10.5155	90.49	97.67	26308905600	26170544400	163117262	94.75	87.71	40.5
1	Hainan	Chengmai	Wuzhishan	WZS	W22	10.6698	92.33	97.24	26694828900	26515624200	168878230	96.39	90.86	42.73
1	Hainan	Chengmai	Wuzhishan	WZS	W24	13.1947	90.26	97.78	33011917200	32835553200	205166876	94.89	87.95	40.66
1	Hainan	Chengmai	Wuzhishan	WZS	W27	10.7984	93.82	97.1	27016563900	26874549000	172526862	97.23	92.7	41.48
1	Hainan	Chengmai	Wuzhishan	WZS	W28	11.0172	92.98	97.1	27564045300	27409715700	175170576	96.59	91.22	42.11
1	Hainan	Chengmai	Wuzhishan	WZS	W30	11.2615	92.75	97.85	28175249700	28025055000	178480082	96.65	91.43	40.53
1	Hainan	Chengmai	Wuzhishan	WZS	W32	11.0678	93.61	97.27	27690578100	27532954500	176561490	97.15	92.56	41.73
1	Hainan	Chengmai	Wuzhishan	WZS	W33	11.0686	94.68	97.44	27692667000	27550198200	178285054	97.54	93.47	42.06
1	Hainan	Chengmai	Wuzhishan	WZS	W35	11.3915	93.72	97.22	28500413100	28344198000	181967088	97.08	92.32	41.31
1	Hainan	Chengmai	Wuzhishan	WZS	W36	11.1122	93.7	98	27801871200	27694176000	177396588	97.05	92.23	40.23
1	Hainan	Chengmai	Wuzhishan	WZS	W37	10.8244	93.33	97.8	27081746700	26959366800	172206642	96.93	91.98	40.14
1	Hainan	Chengmai	Wuzhishan	WZS	W39	11.071	93.15	97.11	27698639700	27541083300	176283518	96.71	91.5	42.9
1	Hainan	Chengmai	Wuzhishan	WZS	W40	10.8619	93.68	97	27175511100	27023428200	173284096	97.21	92.7	41.91
1	Hainan	Chengmai	Wuzhishan	WZS	W42	10.2498	92.89	96.92	25644166500	25487317500	162882276	96.6	91.28	42.7
2	Guangdong	Guangzhou	LargeWhite	LW	LW2	11.1665	91.34	95.61	27937546800	27704951400	136775472	96.09	90.35	41.72
2	Guangdong	Guangzhou	LargeWhite	LW	LW10	11.4177	93.72	97.72	28566077100	28351196700	182523226	96.75	91.65	41.83
2	Guangdong	Guangzhou	LargeWhite	LW	LW11	10.8031	93.67	97.82	27028423800	26862303300	172772714	96.47	91.05	42.39
2	Guangdong	Guangzhou	LargeWhite	LW	LW12	10.8322	93.44	97.89	27101316600	26934822900	172876226	96.33	90.74	41.17
2	Guangdong	Guangzhou	LargeWhite	LW	LW13	10.8955	93.26	97.83	27259664100	27090996000	174106420	96.37	90.87	41.77
2	Guangdong	Guangzhou	LargeWhite	LW	LW14	11.3332	93.29	97.66	28354614600	28176436500	180221872	96.5	90.98	42.16
2	Guangdong	Guangzhou	LargeWhite	LW	LW15	10.8559	93.64	97.7	27160389000	26970863400	173540632	96.42	91	42.23
2	Guangdong	Guangzhou	LargeWhite	LW	LW16	10.4752	93.56	97.35	26208144600	26006119200	167347606	96.48	91.12	42.67
2	Guangdong	Guangzhou	LargeWhite	LW	LW17	10.6384	93.17	97.53	26616242400	26424612900	169869722	96.45	91.05	42.39
2	Guangdong	Guangzhou	LargeWhite	LW	LW18	10.7912	93.11	97.37	26998728600	26790999600	172469914	96.43	91.04	42.83
2	Guangdong	Guangzhou	LargeWhite	LW	LW19	10.7757	91.62	97.82	26959962000	26794509000	170073684	95.63	89.38	42.04
2	Guangdong	Guangzhou	LargeWhite	LW	LW20	11.0156	92.81	97.4	27560151900	27351931800	175341490	96.56	91.22	43.22
2	Guangdong	Guangzhou	LargeWhite	LW	LW21	11.3664	93.17	97.17	28437726600	28233088800	181258460	96.65	91.45	41.45
2	Guangdong	Guangzhou	LargeWhite	LW	LW22	12.5379	92.69	97.1	31368783000	31119471000	199178462	96.28	90.66	41.34
2	Guangdong	Guangzhou	LargeWhite	LW	LW24	10.6346	93.14	97.13	26606831400	26413845900	169812404	96.31	90.78	41.23
2	Guangdong	Guangzhou	LargeWhite	LW	LW25	10.2511	93.16	97.58	25647251100	25463320800	163762776	96.36	90.89	42.11
2	Guangdong	Guangzhou	LargeWhite	LW	LW26	10.5754	92.83	97.7	26458684500	26298720900	168745056	96.06	90.12	41.7
2	Guangdong	Guangzhou	LargeWhite	LW	LW27	12.5792	93.67	96	31472133300	31231461300	201592828	96.75	91.88	41.44
2	Guangdong	Guangzhou	LargeWhite	LW	LW28	11.4206	92.57	97.57	28573347300	28345365600	181275230	96.15	90.42	41.63
2	Guangdong	Guangzhou	LargeWhite	LW	LW29	10.4841	92.89	97.37	26230319100	26038356000	167215900	96.15	90.46	41.64
2	Guangdong	Guangzhou	LargeWhite	LW	LW3	11.1948	93.34	97.82	28008385800	27839575800	178919012	96.41	90.96	42.37
2	Guangdong	Guangzhou	LargeWhite	LW	LW30	13.6714	93.43	97.64	34204553400	33963939600	218856884	96.44	91.03	42.13
2	Guangdong	Guangzhou	LargeWhite	LW	LW31	10.3896	93.2	97.57	25993931100	25803283500	165978582	96.41	91	42.28
2	Guangdong	Guangzhou	LargeWhite	LW	LW32	10.3894	93.26	97.62	25993263900	25810175700	166194414	96.37	90.88	42.2
2	Guangdong	Guangzhou	LargeWhite	LW	LW33	11.9225	93	97.8	29829117000	29621567400	189906108	96.4	90.81	42.03
2	Guangdong	Guangzhou	LargeWhite	LW	LW35	10.3106	93.46	97.81	25796116500	25621925700	165087908	96.49	91.14	42
2	Guangdong	Guangzhou	LargeWhite	LW	LW36	10.9782	93.36	97.13	27466516800	27272985600	175563708	96.38	90.91	41.29
2	Guangdong	Guangzhou	LargeWhite	LW	LW4	10.37	93.56	97.7	25944823800	25779127500	166135726	96.55	91.23	41.94
2	Guangdong	Guangzhou	LargeWhite	LW	LW5	11.0301	92.98	97.6	27596452200	27385167600	176027068	96.36	90.85	42.09
2	Guangdong	Guangzhou	LargeWhite	LW	LW6	10.6314	93.22	97.22	26598817500	26407729800	169910722	96.36	90.75	41.92
2	Guangdong	Guangzhou	LargeWhite	LW	LW8	11.8159	93.34	97.65	29562462600	29360555700	188536582	96.72	91.56	41.49
2	Guangdong	Guangzhou	LargeWhite	LW	LW9	10.5961	92.64	97.54	26510483100	26300032800	168686008	96.14	90.41	42.02
3	Hunan	Jishou	Xiangxi Black	XXB	xxh10	14.2095	93.17	96.18	35550988200	35226055200	226979038	96.35	90.94	41.97
3	Hunan	Jishou	Xiangxi Black	XXB	xxh11	12.3786	93.14	96.32	30970137000	30688328100	197638450	96.38	91.03	41.75
3	Hunan	Jishou	Xiangxi Black	XXB	xxh13	13.298	93.38	97	33270438900	33037878000	212639198	96.45	91.14	41.48
3	Hunan	Jishou	Xiangxi Black	XXB	xxh14	12.1548	93.06	96.93	30410306400	30183002100	193904782	96.29	90.81	41.16
3	Hunan	Jishou	Xiangxi Black	XXB	xxh16	12.0144	93.14	96.65	30059096700	29822995200	192034832	96.35	90.92	41.3
3	Hunan	Jishou	Xiangxi Black	XXB	xxh17	13.785	93.33	97	34488915900	34238007600	220467206	96.35	90.89	41.39
3	Hunan	Jishou	Xiangxi Black	XXB	xxh18	11.7223	93.26	97.2	29328077100	29114648400	187319320	96.34	90.88	41.14
3	Hunan	Jishou	Xiangxi Black	XXB	xxh2	13.4886	93.19	96.61	33747237900	33480242400	215469080	96.38	91.03	41.94
3	Hunan	Jishou	Xiangxi Black	XXB	xxh20	10.4321	91.23	96.58	26100290100	25848309300	163368706	95.97	90.31	41.04
3	Hunan	Jishou	Xiangxi Black	XXB	xxh21	13.2673	93.47	97.15	33193573200	32953774500	212321306	96.44	91.06	41.1
3	Hunan	Jishou	Xiangxi Black	XXB	xxh22	16.066	93.49	97.3	40195802400	39918899100	257139382	96.43	91.07	41.02
3	Hunan	Jishou	Xiangxi Black	XXB	xxh24	15.7337	93.19	96.4	39364230600	39024391500	251509510	96.32	90.84	41.62
3	Hunan	Jishou	Xiangxi Black	XXB	xxh25	12.9796	93.36	96.33	32473924500	32151527100	207702500	96.39	90.94	41.2
3	Hunan	Jishou	Xiangxi Black	XXB	xxh27	14.179	93.4	96.11	35474632500	35174420400	227006554	96.33	90.84	41.31
3	Hunan	Jishou	Xiangxi Black	XXB	xxh29	14.1418	92.82	96.94	35381423100	35104032000	224352480	96.55	91.25	41.02
3	Hunan	Jishou	Xiangxi Black	XXB	xxh3	15.6388	93.05	96.41	39126901500	38809392600	249609108	96.34	90.97	42.62
3	Hunan	Jishou	Xiangxi Black	XXB	xxh30	13.6744	93.21	96.11	34212040500	33882787200	217731552	96.74	91.66	41.08
3	Hunan	Jishou	Xiangxi Black	XXB	xxh31	11.8493	92.62	96.25	29645835000	29365118700	187874522	96.53	91.22	41.22
3	Hunan	Jishou	Xiangxi Black	XXB	xxh5	14.4416	93.05	97.19	36131569500	35855475900	230303560	96.31	90.9	41.77
3	Hunan	Jishou	Xiangxi Black	XXB	xxh7	14.7464	93.22	96.86	36894263400	36596077800	235642884	96.37	90.97	42.02
3	Hunan	Jishou	Xiangxi Black	XXB	xxh8	15.8253	93.08	96.51	39593541000	39182497500	252626398	96.38	91.01	43.36
3	Hunan	Jishou	Xiangxi Black	XXB	xxh9	16.4	93.35	95.76	41031255300	40670425200	262269344	96.42	91.06	41.85

## Sheet: Table S4
Supplementary Table S4: The structure location of SNPs of 5 pig breeds
Structure location	Wuzhishan	LargeWhite	XiangxiBlack	Meishan	Duroc
5_prime_UTR_premature_start_codon_gain_variant	28735	12827	21878	18124	18192
5_prime_UTR_variant	139218	65695	108409	90672	90243
upstream_gene_variant	2952410	1431119	2384905	1941633	1941445
splice_region_variant&intron_variant	24126	11594	18635	15726	15801
3_prime_UTR_variant	319451	150381	246779	208752	211625
downstream_gene_variant	1209238	586147	980812	795553	799363
intron_variant	16729364	8041898	13055414	10976686	11149216
splice_region_variant	32378	15506	25128	20968	21171
synonymous_variant	150015	71810	120937	96178	98758
intergenic_region	13773866	6691979	11097740	8997049	9227003
non_coding_transcript_exon_variant	43480	20954	39843	29325	28989
missense_variant	99638	49442	85155	60709	62995
stop_gained	1304	594	1129	733	770
intragenic_variant	105036	51403	82155	69871	72063
splice_region_variant&non_coding_transcript_exon_variant	2094	961	1663	1354	1365
missense_variant&splice_region_variant	1660	802	1313	977	1042
splice_region_variant&synonymous_variant	2912	1415	2280	1912	1949
splice_donor_variant&intron_variant	956	438	766	604	592
splice_acceptor_variant&intron_variant	740	381	582	458	469
start_lost	323	167	267	200	211
splice_acceptor_variant&splice_donor_variant&intron_variant	70	37	64	53	50
stop_lost	278	159	256	190	190
stop_retained_variant	126	71	105	96	100
stop_lost&splice_region_variant	47	23	47	34	32
splice_region_variant&stop_retained_variant	21	11	20	12	16
stop_gained&splice_region_variant	22	16	20	12	15
non_coding_transcript_variant	503	423	400	282	299
start_lost&splice_region_variant	8	5	9	7	6
initiator_codon_variant	42	24	31	26	21
initiator_codon_variant&splice_region_variant	1	1	1	1	1
Total	35618062	17206283	28276743	23328197	23743992

## Sheet: Table S5
Supplementary Table S5: The genes of top 5% genetic selection region between WZS pigs and other pigs
Genes	WZS vs LW	WZS vs XXB	WZS vs Meishan	WZS vs Duroc
1	CYLC2	KHDRBS3	VPS13A	VPS13A
2	FKTN	ZFAT	GNA14	GNA14
3	TAL2	NDRG1	ZNF304	IL4I1
4	TMEM38B	WISP1	ZNF416	TBC1D17
5	SBF2	TG	ZNF134	NUP62
6	SWAP70	SLA	NOL4	ATF5
7	WNT3A	PHF20L1	SLC25A21	SIGLEC11
8	ARF1	TMEM71	ADGRL3	VRK3
9	MRPL55	LRRC6	OPCML	ZNF473
10	GUK1	ATAD2	SPATA19	IZUMO2
11	PGBD2	ZHX1	IGSF9B	MYH14
12	ZNF692	FAM83A	JAM3	KCTD19
13	ZNF672	TBC1D31	NCAPD3	BRMS1L
14	SH3BP5L	DERL1	IQCG	RALGAPA1
15	GCSAML	ZHX2	LMLN	INSM2
16	NLRP3	ENPP2	RPL35A	SPATA19
17	ZNF496	NOV	OSBPL11	IGSF9B
18	TRIM52	MAL2	SNX4	SLITRK3
19	TRIM41	COLEC10	ZNF148	FHIT
20	RACK1	SAMD12	SETD5	FSIP2
21	TRIM7	ITFG1	LHFPL4	PPP1R1C
22	BTNL9	NETO2	MTMR14	PDE1A
23	ZFP62	DNAJA2	CPNE9	DNAJC10
24	MGAT1	GPT2	BRPF1	FRZB
25	ATP13A1	MYLK3	OGG1	PDE4D
26	GMIP	ORC6	CAMK1
27	LPAR2	VPS35	TADA3
28	PBX4	SHCBP1	ARPC4
29	CILP2	TMC4	TTLL3
30	YJEFN3	MBOAT7	RPUSD3
31	NDUFA13	LENG1	CIDEC
32	GATAD2A	CNOT3	JAGN1
33	TSSK6	PRPF31	IL17RE
34	MAU2	TFPT	IL17RC
35	SUGP1	NDUFA3	CRELD1
36	TM6SF2	OSCAR	PRRT3
37	HAPLN4	TARM1	EMC3
38	NCAN	CACNG6	FANCD2
39	RFXANK	CACNG7	FSIP2
40	BORCS8	PRKCG	ZNF804A
41	MEF2B	MYADM	PPP1R1C
42	TMEM161A	PEG3	PDE1A
43	SLC25A42	OPRD1	DNAJC10
44	SLC5A5	EPB41	FRZB
45	RPL18A	MECR	NCKAP1
46	JAK3	PTPRU	DUSP19
47	INSL3	YES1	NUP35
48	B3GNT3	ENOSF1	CCDC141
49	FCHO1	TYMS	SESTD1
50	NWD1	CLUL1	NFE2L2
51	TMEM38A	COLEC12	AGPS
52	SMIM7	SLC1A7	TLK1
53	MED26	PODN	METTL8
54	SLC35E1	SCP2	DCAF17
55	CHERP	ECHDC2	CYBRD1
56	BRD4	ZYG11A	DYNC1I2
57	EPHX3	ZYG11B	ESM1
58	NOTCH3	EPS15	GZMK
59	ILVBL	TTC39A	GZMA
60	SYDE1	RNF11	CDC20B
61	CASP14	ELAVL4	GPX8
62	CCDC105	AGBL4	FGF10
63	SLC1A6	FOXD2
64	R1C1	FOXE3
65	FBXL12	CMPK1
66	UBL5	STIL
67	DNMT1	TAL1
68	S1PR2	PDZK1IP1
69	MRPL4	NEO1
70	ICAM1	ADPGK
71	ICAM4	BBS4
72	ICAM3	ARIH1
73	TYK2	FAM177A1
74	CDC37	SRP54
75	PDE4A	BAZ1A
76	KEAP1	CFL2
77	S1PR5	DPF3
78	ATG4D	DCAF4
79	KRI1	ZFYVE1
80	CDKN2D	RBM25
81	AP1M2	MAP9
82	SLC44A2	TLL1
83	ILF3	HADH
84	QTRT1	SGMS2
85	KANK2	PAPSS1
86	DOCK6	GUCY1A2
87	ANGPTL8	RUNDC3B
88	TSPAN16	KIAA1324L
89	RAB3D	GRM3
90	TMEM205	EGFR
91	CCDC159	LARP4B
92	PLPPR2	DIP2C
93	SWSAP1	TSC22D1
94	EPOR	SERP2
95	RGL3	SLAIN1
96	PRKCSH	EDNRB
97	ELAVL3	CD80
98	ZNF653	TIMMDC1
99	ECSIT	POGLUT1
100	CNN1	TMEM39A
101	ELOF1	ARHGAP31
102	PTPRS	B4GALT4
103	KDM4B	UPK1B
104	UHRF1	IGSF11
105	ARRDC5	RASA2
106	PLIN3	PPP2R3A
107	TICAM1	MSL2
108	FEM1A	PCCB
109	DPP9	GRM7
110	MYDGF	CCDC66
111	TNFAIP8L1	FAM208A
112	ZNF554	ARHGEF3
113	THOP1	ERC2
114	SGTA	DCP1A
115	SLC39A3	CACNA1D
116	DIRAS1	CACNA2D3
117	GNG7	WNT5A
118	GADD45B	CCDC36
119	LMNB2	USP4
120	TIMM13	GPX1
121	TMPRSS9	RHOA
122	RASGEF1C	BSN
123	RNF130	APEH
124	TBC1D9B	MST1
125	MRNIP	RNF123
126	SQSTM1	IP6K1
127	MGAT4B	UBA7
128	LTC4S	TRAIP
129	MAML1	CAMKV
130	CANX	MST1R
131	CBY3	MON1A
132	HNRNPH1	RBM6
133	RUFY1	SEMA3F
134	ADAMTS2	GNAT1
135	FAM193B	SLC38A3
136	DDX41	GNAI2
137	DOK3	SEMA3B
138	PDLIM7	LSMEM2
139	DBN1	IFRD2
140	GRK6	HYAL3
141	PRR7	NAT6
142	F12	HYAL1
143	PFN3	HYAL2
144	SLC34A1	TUSC2
145	RGS14	RASSF1
146	LMAN2	NPRL2
147	MXD3	CACNA2D2
148	PRELID1	TMEM115
149	RAB24	MAPKAPK3
150	NSD1	DOCK3
151	ANKHD1	DCAF1
152	SRA1	RAD54L2
153	APBB3	RRP9
154	EIF4EBP3	PARP3
155	SLC35A4	GPR62
156	CD14	PCBP4
157	TMCO6	ABHD14B
158	NDUFA2	ABHD14A
159	IK	ACY1
160	WDR55	RPL29
161	DND1	DUSP7
162	ZMAT2	POC1A
163	PCDHA11	ALAS1
164	SPRED2	TLR9
165	ACTR2	TWF2
166	EMC2	PPM1M
167	PENK	WDR82
168	SDR16C5	GLYCTK
169	CHCHD7	DNAH1
170	PLAG1	SEMA3G
171	MOS	TNNC1
172	UBE2V2	NISCH
173	PRKDC	STAB1
174	MCM4	SHISA5
175	PRRX1	PFKFB4
176	GORAB	PFKFB4
177	KIFAP3	COL7A1
178	SCYL3	SLC26A6
179	XCL1	CELSR3
180	TBX19	NCKIPSD
181	SFT2D2	IP6K2
182	TIPRL	PRKAR2A
183	DCAF6	SLC25A20
184	MPC2	ARIH2
185	ADCY10	ARIH2OS
186	MPZL1	P4HTM
187	STAT2	WDR6
188	APOF	DALRD3
189	MIP	DHX30
190	SPRYD4	MAP4
191	GLS2	ZNF445
192	RBMS2	ZKSCAN7
193	BAZ2A	ZNF660
194	PTGES3	ZNF197
195	NACA	ZNF35
196	KCNC2	KIAA1143
197	BICD1	KIF15
198	ITPR2	TMEM42
199	SSPN	NABP1
200	RASSF8	SLC4A10
201	LMNTD1	DPP4
202	SOX5	ZRANB3
203	PDE3A	RAB3GAP1
204	PLCZ1	RAB3C
205	PIK3C2G	PRNP
206	RERGL	PRND
207	IGF1	RASSF2
208	IGF1	SLC23A2
209	IGF1	CSGALNACT1
210	PARPBP	PSD3
211	NUP37	CCT8L2
212	WASHC3	KMT2C
213	SLC9A5	GALNT11
214	PLEKHG4	GALNTL5
215	LRRC36
216	KCTD19
217	ZDHHC1
218	HSD11B2
219	ATP6V0D1
220	AGRP
221	RIPOR1
222	CTCF
223	CARMIL2
224	ACD
225	PARD6A
226	ENKD1
227	GFOD2
228	RANBP10
229	TSNAXIP1
230	CENPT
231	THAP11
232	NUTF2
233	EDC4
234	NRN1L
235	LONP2
236	ABCC11
237	PHKB
238	ITFG1
239	NETO2
240	DNAJA2
241	GPT2
242	MYLK3
243	ORC6
244	VPS35
245	SHCBP1
246	SS18
247	PSMA8
248	TAF4B
249	GMDS
250	SUPT3H
251	RUNX2
252	PDE2A
253	ARAP1
254	STARD10
255	ATG16L2
256	FCHSD2
257	NCAM1
258	TTC12
259	DRD2
260	TMPRSS5
261	ZW10
262	USP28
263	HTR3B
264	NFASC
265	GRM3
266	HGF
267	SEMA3C
268	CD36
269	GNAT3
270	GNAI1
271	TMEM183A
272	PPFIA4
273	MYOG
274	ADORA1
275	TNFSF18
276	RABGAP1L
277	PAPPA2
278	ASTN1
279	MYL4
280	CDC27
281	KANSL1
282	MAPT
283	RUNX1
284	ADAMTS9
285	IL17RD
286	HESX1
287	APPL1
288	ASB14
289	DNAH12
290	PDE12
291	ARF4
292	LRMDA
293	KCNMA1
294	ADK
295	VCL
296	AP3M1
297	TRAK2
298	STRADB
299	C2CD6
300	TMEM237
301	MPP4
302	ANKRD44
303	SF3B1
304	HSPD1
305	HSPE1
306	MOBKL3
307	RFTN2
308	BOLL
309	PLCL1
310	NEMP2
311	GLS
312	STAT1
313	STAT4
314	MYO1B
315	NABP1
316	GULP1
317	PDE11A
318	RBM45
319	GALNT5
320	ERMN
321	CYTIP
322	KCNJ3
323	EN1
324	CCNB1
325	SLC30A5
326	CENPH
327	MARVELD2
328	OCLN
329	CCDC125
330	AK6
331	RAD17
332	GTF2H2
333	NAIP
334	SMN1
335	BDP1
336	MCCC2
337	MAP1B
338	MRPS27
339	PTCD2
340	ZNF366
341	KIF16B
342	SNRPB2
343	OTOR
344	PCSK2
345	NRF1
346	SMKR1
347	STRIP2
348	AHCYL2
349	WDR91
350	TMEM140
351	AGBL3
352	CALD1
353	VIPR2
354	ESYT2

## Sheet: Table S6
Supplementary Table S6: The KEGG enrichment of the top 5% between WZS pigs and LW pigs
ID	Description	GeneRatio	BgRatio	pvalue	p.adjust	geneID
ssc05032	Morphine addiction	9/158	92/8934	3.34e-05	3.34e-05	PDE4A/GNG7/GRK6/PDE3A/PDE2A/GNAI1/ADORA1/
						PDE11A/KCNJ3
ssc04371	Apelin signaling pathway	9/158	138/8934	0.000739	0.000739	MEF2B/NOTCH3/GNG7/ADCY10/ITPR2/MYLK3/GNAI1/
						MYL4/NRF1
ssc04724	Glutamatergic synapse	8/158	113/8934	0.000852	0.000852	SLC1A6/GNG7/GLS2/ITPR2/GRM3/GNAI1/GLS/KCNJ3
ssc00230	Purine metabolism	8/158	129/8934	0.002003	0.002003	GUK1/PDE4A/ADCY10/PDE3A/PDE2A/ADK/PDE11A/AK6
ssc00470	D-Amino acid metabolism	2/158	6/8934	0.004449	0.004449	GLS2/GLS
ssc00220	Arginine biosynthesis	3/158	20/8934	0.00496	0.00496	GLS2/GPT2/GLS
ssc04727	GABAergic synapse	6/158	91/8934	0.005387	0.005387	GNG7/GLS2/GNAI1/TRAK2/PLCL1/GLS
ssc04110	Cell cycle	8/158	154/8934	0.00592	0.00592	MAU2/CDKN2D/GADD45B/PRKDC/MCM4/ORC6/CDC27/
						CCNB1
ssc04658	Th1 and Th2 cell differentiation	6/158	93/8934	0.005986	0.005986	JAK3/NOTCH3/TYK2/MAML1/STAT1/STAT4
ssc04217	Necroptosis	8/158	157/8934	0.006633	0.006633	NLRP3/JAK3/TYK2/TICAM1/SQSTM1/STAT2/STAT1/STAT4
ssc04924	Renin secretion	5/158	69/8934	0.007348	0.007348	ITPR2/PDE3A/GNAI1/ADORA1/KCNMA1
ssc04022	cGMP-PKG signaling pathway	8/158	167/8934	0.009486	0.009486	MEF2B/ITPR2/PDE3A/MYLK3/PDE2A/GNAI1/ADORA1/
						KCNMA1
ssc04928	Parathyroid hormone synthesis, secretion and action	6/158	105/8934	0.01064	0.01064	PDE4A/SLC34A1/NACA/ITPR2/RUNX2/GNAI1
Note: The ID was the KEGG pathway ID; the description was the name of the pathway; the GeneRatio was the enriched gene number of corresponding pathway divided the total gene number of all enriched pathways; the BgRatio was the total gene number of corresponding pathway divided the total genes of all enriched pathways; P value was the statistical P value; P.adjust was the adjust P value; geneID wa…

## Sheet: Table S7
Supplementary Table S7: The KEGG enrichment of the top 5% between WZS pigs and XXB pigs
ID	Description	GeneRatio	BgRatio	pvalue	p.adjust	geneID
ssc04921	Oxytocin signaling pathway	11/95	148/8934	4.21e-07	4.21e-07	MYLK3/CACNG6/CACNG7/PRKCG/GUCY1A2/EGFR/CACNA1D/
						CACNA2D3/RHOA/GNAI2/CACNA2D2
ssc04261	Adrenergic signaling in cardiomyocytes	8/95	149/8934	0.000177	0.000177	CACNG6/CACNG7/PPP2R3A/CACNA1D/CACNA2D3/GNAI2/
						CACNA2D2/TNNC1
ssc04724	Glutamatergic synapse	7/95	113/8934	0.00019	0.00019	PRKCG/SLC1A7/GRM3/GRM7/CACNA1D/SLC38A3/GNAI2
ssc04360	Axon guidance	8/95	182/8934	0.000683	0.000683	NEO1/CFL2/WNT5A/RHOA/SEMA3F/GNAI2/SEMA3B/SEMA3G
ssc00531	Glycosaminoglycan degradation	3/95	18/8934	0.000847	0.000847	HYAL3/HYAL1/HYAL2
ssc04010	MAPK signaling pathway	10/95	289/8934	0.000956	0.000956	CACNG6/CACNG7/PRKCG/EGFR/RASA2/CACNA1D/CACNA2D3/
						CACNA2D2/MAPKAPK3/DUSP7
ssc05412	Arrhythmogenic right ventricular cardiomyopathy	5/95	76/8934	0.001246	0.001246	CACNG6/CACNG7/CACNA1D/CACNA2D3/CACNA2D2
ssc04071	Sphingolipid signaling pathway	6/95	120/8934	0.001702	0.001702	PRKCG/OPRD1/SGMS2/PPP2R3A/RHOA/GNAI2
ssc04022	cGMP-PKG signaling pathway	7/95	167/8934	0.001956	0.001956	MYLK3/OPRD1/GUCY1A2/EDNRB/CACNA1D/RHOA/GNAI2
ssc04020	Calcium signaling pathway	8/95	244/8934	0.004339	0.004339	MYLK3/PRKCG/EGFR/EDNRB/CACNA1D/MST1/MST1R/TNNC1
ssc04540	Gap junction	4/95	85/8934	0.012612	0.012612	PRKCG/GUCY1A2/EGFR/GNAI2
ssc00514	Other types of O-glycan biosynthesis	3/95	47/8934	0.013473	0.013473	POGLUT1/GALNT11/GALNTL5
ssc04270	Vascular smooth muscle contraction	5/95	137/8934	0.015193	0.015193	MYLK3/PRKCG/GUCY1A2/CACNA1D/RHOA
ssc04727	GABAergic synapse	4/95	91/8934	0.015868	0.015868	PRKCG/CACNA1D/SLC38A3/GNAI2
ssc00220	Arginine biosynthesis	2/95	20/8934	0.018771	0.018771	GPT2/ACY1
ssc04713	Circadian entrainment	4/95	99/8934	0.020968	0.020968	PRKCG/GUCY1A2/CACNA1D/GNAI2
ssc04916	Melanogenesis	4/95	99/8934	0.020968	0.020968	PRKCG/EDNRB/WNT5A/GNAI2
ssc01212	Fatty acid metabolism	3/95	57/8934	0.022537	0.022537	MECR/SCP2/HADH
ssc04730	Long-term depression	3/95	59/8934	0.024664	0.024664	PRKCG/GUCY1A2/GNAI2
ssc04928	Parathyroid hormone synthesis, secretion and action	4/95	105/8934	0.025385	0.025385	PRKCG/EGFR/RHOA/GNAI2
Note: The ID was the KEGG pathway ID; the description was the name of the pathway; the GeneRatio was the enriched gene number of corresponding pathway divided the total gene number of all enriched pathways; the BgRatio was the total gene number of corresponding pathway divided the total genes of all enriched pathways; P value was the statistical P value; P.adjust was the adjust P value; geneID wa…

## Sheet: Table S8
Supplementary Table S8: The SVs of 5 genes from PPI network
Breeds	#Chr	Start	End	Ref	Alt	GeneName	Func	Gene	SVs
WZS	HSPD1	NC_010457.5	101364951	101365008	TTTTTAAATATTCTTTGCCATTATATTTTATCACAAGATATTAAATATAGTTCCTTGT	-	intronic	rna-NM_001254716.1#NC_010457.5#101360354	DEL
WZS	HSPD1	NC_010457.5	101368729	101368729	0	AAAAAAAAAAAAAAAAAAAAAAAAAAATGGGGGTGGTGGGGGGGGGATATAAAAAAAAA	intronic	rna-NM_001254716.1#NC_010457.5#101360354	INS
WZS	STAT1	NC_010457.5	95642470	95642789	AAATATCTCGCTTAGGAGTTTCCGTCGTGGCGCAGTGGTTAACGAATCCGACTAGGTACCATGAGGTTGCGGGTTCGATCCCTGCCCTTGCTCAGTGGGTTAACGATCCGGCGTTGCTGTGAGCTGTGGTGTAGGTTGCAGACGCGGCTCGGATCCCGAGTTGCTGTGGCTCTGGCGTAGGCCGGTGGCTACAGCTCCGATTCAACCCCTAGCCTGGGAACCTCCATATGCCGTGGAAGCAGCCCAAGAAATAGCAACAACAACAACAAAAAAAAAGACAAAAAAAATAAATAAATAAATAAAATAAAATAAAATAAAAA	0	intronic	rna-XM_021074656.1#NC_010457.5#95593943;rna-XM_021074658.1#NC_010457.5#95594466;rna-XM_021074660.1#NC_010457.5#95605290;rna-XM_021074662.1#NC_010457.5#95602273;rna-XM_021074663.1#NC_010457.5#95602280;rna-XM_021074664.1#NC_010457.5#95594468	DEL
WZS	STAT4	NC_010457.5	95659606	95659631	AACAACAACAACAACAAAAAAAAAAA	-	intronic	rna-NM_001197305.1#NC_010457.5#95656208;rna-XM_021074683.1#NC_010457.5#95656205;rna-XM_021074684.1#NC_010457.5#95656205	DEL
WZS	IGF1	NC_010447.5	81848197	81848219	TATATATATATATATATATATAT	-	UTR3	rna-XM_005664197.3#NC_010447.5#81776396;rna-XM_005664198.3#NC_010447.5#81776426;rna-XM_005664199.3#NC_010447.5#81776775	DEL
WZS	RUNX2	NC_010449.5	40187461	40187744	TTTTTTTTTTTTTTTTTTGTCTTTTTGCCATTTTCTTGGGCCGCTCTCGCGGCATATGGAGGTTCCCAGGCTAGGGGTCGAATCGGAGCTGTAGCCACCGGCCTACGCCAGAGCCACAGCAACGTGGGATCCGAGCCGCGTCTGCAACCTACACCCCAGCTCACAGCAACGCCGGATCGTTAACCCACTGAGCAAGGGCAGGGACCGAACCCGCAACATCATGGTTCCTAGTCGGGTTCGTTAACCACTGCGCCACGACGGGAACTCCAAGTTTTTTTTTTGTC	0	intronic	rna-XM_003482203.4#NC_010449.5#40106580;rna-XM_005666073.3#NC_010449.5#40106580;rna-XM_005666074.3#NC_010449.5#40106580	DEL
WZS	RUNX2	NC_010449.5	40267324	40267618	AGAGAGTTGTGGAGTTCCCGTTGTGGCGCAGTGGTTAACGAATCCGACTAGGAACCATGAGGTTGCGGGTTCGGTCCCTGCCCTTGCTCAGTGGGTTAACGATCCGGCGTTGCCGTGAGCTGTGGTGTAGGTTGCAGACGCGGCTCGGATCCCGAGTTGCTGTGGCTCTGGTGTAGGCCAGTGGCTACAGCTCCGATTCAACTCCTAGACTGGGAACCTCCATATGCCGCGGGAGCGGCCCAAGAAATAGCAACAACAACAACAAAAGACAAAAAGACAAAAAAAAAAAAAAATC	0	intronic	rna-XM_003482203.4#NC_010449.5#40106580;rna-XM_005666073.3#NC_010449.5#40106580;rna-XM_005666074.3#NC_010449.5#40106580	DEL
WZS	RUNX2	NC_010449.5	40132920	40133230	AAGAATGTTCTCCTAGGAGTTCCCGTCGTAGCGCAGTGGTTAACGAATCCGACTAGGAACCATGAGGTTGCGGGTTCGGTCCCTGCCCTTGCTCAGTAGGTTAACGATCCGGCGTTGCCGTGAGCTGTGGTGTAGGTTGCAGACGCGGCTCGGATCCCACGTTGCTGTGGCTCTGGTGTAGGCCAGTGGCTACAGCTCCGATTAGACCCCTAGCCTGGGAACCTCCATATGCCGCGGGAGCGGCCCAAGAAATAGCAAAAAGACCAAAAAAAAAAAAAAAAAAAAAAAAAAAAAAAAAAAAAAAAAAAAAA	-	intronic	rna-XM_003482203.4#NC_010449.5#40106580;rna-XM_005666073.3#NC_010449.5#40106580;rna-XM_005666074.3#NC_010449.5#40106580;rna-XM_021099856.1#NC_010449.5#39764746;rna-XM_021099857.1#NC_010449.5#39763302;rna-XM_021099859.1#NC_010449.5#39764746	DEL

## Sheet: Table S9
Supplementary Table S9: The KEGG enrichment of the DEGs from liver tissue between WZS pigs and LW pigs
ID	Description	GeneRatio	BgRatio	pvalue	p.adjust	geneID
ssc05208	Chemical carcinogenesis - reactive oxygen species	114/2018	227/9028	1.09e-20	1.73e-18	COX3/ND3/SLC25A6/ND4L/AKT2/ATP5F1E/SDHA/VDAC1/COX4I1/
						HMOX1/MAP2K2/SLC25A4/HIF1A/AKR1C1/ATP5PB/UQCRC1/ATP5F1D/
						ATP5F1C/MGST3/SOD1/GSTA1/EGFR/GSTO1/PIK3CD/ATP5MC2/EPHX2/
						PTEN/SDHD/PIK3CA/COX8A/SOS1/PDPK1/CYC1/ATP5MC3/SLC25A5/
						KEAP1/RAF1/COX6A1/COX7A2L/COX7C/PRKD3/AHR/NDUFS8/BRAF/
						COX6C/ARNT/UQCRQ/AKT3/NDUFA10/PRKCD/NDUFV1/COX5B/
						NDUFS5/HGF/NCF1/NDUFAB1/AKR1A1/CYP1B1/CYP1A2/NDUFS4/
						NDUFB10/NDUFB9/NCF2/NDUFS7/COX6B/LOC100524873/NDUFV2/
						ATP5PF/ABL2/ATP5MC1/ACP1/NDUFS3/UQCR10/NDUFB8/MAPK8/
						NDUFV3/NDUFA12/NDUFA2/NDUFC2/PIK3CB/NDUFA8/COX7A2/
						KRAS/SLC26A2/UQCRB/PLD1/NDUFB7/NDUFB6/NDUFA13/
						LOC100622246/PIK3R2/NDUFC1/NDUFA11/NDUFA7/
						NDUFB11/NDUFA6/NDUFB2/CHUK/NDUFS6/NDUFB3/LOC780435/
						GSTA4/HRAS/NDUFA1/COX7A1/NDUFA3/MGST2/BAD/LOC100153094/
						NDUFB1/AKR1C2/ATP8/LOC100151901/LOC100526118
ssc05171	Coronavirus disease - COVID-19	122/2018	251/9028	1.57e-20	1.73e-18	FGB/FGA/FGG/RPS2/RPLP1/RPL4/RPL6/RPL13A/RPS11/C4A/RPSA/OAS2/
						RPL7A/RPS8/RPS20/RPL17/STAT1/RPS6/RPS7/RPS3/RPL23A/RPS15/RPL19/
						RPL3/RPL8/RPS24/RPL13/RPS12/RPL18/RPS16/RPL32/RPL14/RPL29/RPS5/
						RPS10/IL6ST/RPS19/RPL31/RPLP2/RPL15/RPS9/RPL11/RPL27A/RPL35/
						RPS26/RPL10A/RPL26/RPL28/RPS14/JAK1/RPL18A/RPL12/RPS27/RPS18/
						RPL30/RPS15A/EIF2AK2/RPL23/RPS17/RPL21/RIGI/RPL27/RPS13/C5/
						RPL37/RPS25/RPL35A/RPL24/RPL38/RPS21/C6/CFD/RPL36/RPL22/
						RPS28/STAT3/IFIH1/ADAR/RPS29/TAB2/C7/C3AR1/IFNAR1/TLR8/EGFR/
						PIK3CD/F13A1/MBL2/PIK3CA/AGTR1/RPL36A/TLR4/PRKCB/SYK/
						RPL36AL/GP91-PHOX/FAU/C5AR1/RPL22L1/ADAM17/C8G/TLR2/TLR7/
						RPS27L/IRF3/CASP1/NFKBIB/MAPK8/PRKCA/TLR3/MYD88/PIK3CB/
						PIK3R2/RPL3L/RPL26L1/IRAK4/CHUK/LOC110261249/LOC100519675/
						NLRP3/SELP/LOC100525692
ssc05415	Diabetic cardiomyopathy	102/2018	205/9028	2.94e-18	2.42e-16	COX3/GAPDH/PDK4/ATP2A2/ND3/SLC25A6/ND4L/AKT2/ATP5F1E/
						TGFBR2/SDHA/PDHA1/VDAC1/COX4I1/SLC25A4/LOC100511343/
						ATP5PB/UQCRC1/ATP2A3/ATP5F1D/ATP5F1C/PIK3CD/GFPT1/ATP5MC2/
						PTEN/SDHD/TGFBR1/PDHB/PIK3CA/AGTR1/SP1/COX8A/CYC1/
						ATP5MC3/SLC25A5/TBC1D4/PRKCB/COX6A1/COX7A2L/COX7C/PTPA/
						NDUFS8/GP91PHOX/COX6C/CAMK2D/UQCRQ/AKT3/NDUFA10/PRKCD/
						NDUFV1/COX5B/NDUFS5/GYS2/NCF1/NDUFAB1/NDUFS4/NDUFB10/
						NDUFB9/PDK2/NCF2/NDUFS7/COX6B/LOC100524873/NDUFV2/ATP5PF/
						CPT2/ATP5MC1/NDUFS3/UQCR10/NDUFB8/TGFB2/MAPK8/PRKCA/
						NDUFV3/SLC2A1/NDUFA12/NDUFA2/NDUFC2/PIK3CB/NDUFA8/
						COX7A2/IRS1/UQCRB/NDUFB7/NDUFB6/NDUFA13/PIK3R2/NDUFC1/
						NDUFA11/NDUFA7/NDUFB11/NDUFA6/NDUFB2/NDUFS6/NDUFB3/
						PPARA/NDUFA1/COX7A1/NDUFA3/PRKCZ/NDUFB1/ATP8
ssc00190	Oxidative phosphorylation	71/2018	137/9028	3.08e-14	2.03e-12	COX3/ND3/ND4L/ATP5F1E/SDHA/COX4I1/ATP5PB/UQCRC1/ATP5F1D/
						ATP5F1C/ATP5MC2/SDHD/COX8A/CYC1/ATP5MC3/COX6A1/COX7A2L/
						COX7C/ATP5MG/NDUFS8/COX6C/ATP6V1A/UQCRQ/NDUFA10/NDUFV1/
						ATP6V0A2/COX5B/NDUFS5/ATP6V0B/NDUFAB1/NDUFS4/ATP5MF/
						NDUFB10/NDUFB9/NDUFS7/COX6B/LOC100524873/NDUFV2/ATP5PF/
						ATP5MC1/NDUFS3/UQCR10/NDUFB8/COX17/NDUFV3/NDUFA12/
						NDUFA2/NDUFC2/NDUFA8/COX7A2/UQCRB/NDUFB7/ATP6V1F/
						NDUFB6/NDUFA13/NDUFC1/NDUFA11/LHPP/NDUFA7/NDUFB11/
						NDUFA6/NDUFB2/NDUFS6/NDUFB3/ATP5ME/NDUFA1/COX7A1/
						NDUFA3/NDUFB1/ATP8/ATP6V1G3
ssc05012	Parkinson disease	111/2018	268/9028	1.05e-12	5.74e-11	COX3/ND3/SLC25A6/ND4L/ATF4/ATP5F1E/SDHA/KIF5B/VDAC1/COX4I1/
						PINK1/SLC25A4/PRKACB/ATP5PB/UQCRC1/CALM3/ATP5F1D/ATP5F1C/
						SOD1/LRRK2/PSMD3/ATP5MC2/SDHD/PSMC3/PARK7/SLC39A14/PSMA7/
						COX8A/PSMC5/CYC1/ATP5MC3/SLC25A5/KEAP1/COX6A1/COX7A2L/
						COX7C/TUBB4B/PSMD13/PSMB1/NDUFS8/COX6C/CAMK2D/TXN/UQCRQ/
						NDUFA10/ITPR1/NDUFV1/COX5B/NDUFS5/PSMC1/ADRM1/PSMB7/
						NDUFAB1/PSMD8/NDUFS4/NDUFB10/NDUFB9/NDUFS7/COX6B/
						LOC100524873/NDUFV2/PSMB5/ATP5PF/TRAP1/ATP5MC1/SLC39A7/
						NDUFS3/PSMB6/UQCR10/NDUFB8/APAF1/MAPK8/NDUFV3/SLC39A10/
						PSMB3/NDUFA12/NDUFA2/SLC39A13/NDUFC2/NDUFA8/COX7A2/ITPR3/
						UQCRB/UBE2J2/NDUFB7/UBE2G2/NDUFB6/NDUFA13/SLC39A11/NDUFC1/
						NDUFA11/NDUFA7/NDUFB11/SLC39A5/NDUFA6/NDUFB2/MAPT/NDUFS6/
						NDUFB3/DDIT3/NDUFA1/HTRA2/BAX/COX7A1/NDUFA3/NDUFB1/
						SLC39A3/ATP8/LOC100158003/LOC102157770/SLC39A4
ssc04714	Thermogenesis	98/2018	232/9028	5.81e-12	2.34e-10	COX3/ACTG1/RPS6/ND3/ND4L/ATP5F1E/SDHA/COX4I1/PRKACB/
						ARID1A/ATP5PB/UQCRC1/ADCY7/ATP5F1D/ATP5F1C/PRKAA2/ATP5MC2/
						SDHD/RPS6KA3/COX8A/SOS1/CYC1/ATP5MC3/COX6A1/COX7A2L/
						KDM3B/COX7C/ATP5MG/KDM3A/NDUFS8/COX6C/RHEB/UQCRQ/
						NDUFA10/NDUFV1/COX5B/NDUFS5/NDUFAB1/SMARCE1/NDUFS4/
						ATP5MF/NDUFB10/NDUFB9/NDUFS7/COX6B/LOC100524873/NDUFV2/
						ATP5PF/CPT2/ATP5MC1/NDUFS3/PRKAA1/AKT1S1/UQCR10/NDUFB8/
						SMARCB1/SLC25A20/COX17/NDUFV3/FRS2/PRKG1/NDUFA12/NDUFA2/
						COX19/NDUFC2/CREB3L3/NDUFA8/COX7A2/KRAS/UQCRB/NDUFB7/
						NDUFB6/NDUFA13/NDUFC1/NDUFA11/COA1/NDUFA7/NDUFB11/
						NDUFA6/NDUFB2/RPS6KB2/LOC100518575/NDUFS6/NDUFB3/HRAS/
						ATP5ME/NDUFA1/COX7A1/NDUFA3/NDUFAF8/NDUFB1/SIRT6/COA6/
						ATP8/COA4/COX16/NDUFAF2/FGF21
ssc04932	Non-alcoholic fatty liver disease	74/2018	158/9028	6.39e-12	2.34e-10	COX3/ATF4/AKT2/RXRA/SDHA/COX4I1/UQCRC1/SOCS3/MLXIP/
						PRKAA2/PIK3CD/NR1H3/SDHD/PIK3CA/MLXIPL/COX8A/CYC1/COX6A1/
						COX7A2L/COX7C/NDUFS8/COX6C/UQCRQ/AKT3/NDUFA10/NDUFV1/
						COX5B/ADIPOR1/NDUFS5/NDUFAB1/BCL2L11/NDUFS4/NDUFB10/
						NDUFB9/NDUFS7/COX6B/LOC100524873/NDUFV2/NDUFS3/PRKAA1/
						UQCR10/MLX/NDUFB8/MAPK8/NDUFV3/CASP8/NDUFA12/NDUFA2/
						NDUFC2/PIK3CB/NDUFA8/COX7A2/IRS1/UQCRB/NDUFB7/NDUFB6/
						NDUFA13/PIK3R2/NDUFC1/NDUFA11/NDUFA7/NDUFB11/NDUFA6/
						NDUFB2/NDUFS6/NDUFB3/PPARA/DDIT3/NDUFA1/PKLR/BAX/COX7A1/
						NDUFA3/NDUFB1
ssc04068	FoxO signaling pathway	54/2018	130/9028	6.5e-07	1.43e-05	PCK1/AKT2/TNFSF10/TGFBR2/MAP2K2/STAT3/EP300/CREBBP/S1PR1/
						BNIP3/STK4/IGF1/PRKAA2/EGFR/GABARAPL1/PIK3CD/SMAD4/PTEN/
						TGFBR1/PIK3CA/SOS1/PDPK1/ATM/PCK2/RAF1/BRAF/LOC100523244/
						AKT3/G6PC1/BCL2L11/S1PR4/IGF1R/GADD45G/PRKAA1/TGFB2/MAPK8/
						CCND1/AGAP2/PIK3CB/KRAS/IRS1/CCND2/PIK3R2/LOC100521447/CHUK/
						CDKN2D/PLK3/HRAS/CDK2/CDKN2B/PLK1/HOMER3/SKP2/CCNB2
ssc04218	Cellular senescence	58/2018	154/9028	1.06e-05	0.000193	SLA-3/SLC25A6/AKT2/SLA-1/SQSTM1/ZFP36L2/TGFBR2/HIPK3/HIPK1/
						VDAC1/MAP2K2/SLC25A4/CALM3/TRPM7/PPP3CA/PIK3CD/SLA6/PTEN/
						TGFBR1/PIK3CA/ATM/FBXW11/SLC25A5/RAF1/NFATC3/RAD50/RHEB/
						HIPK2/RRAS/AKT3/ITPR1/EIF4EBP1/CDK4/RB1/GADD45G/ATR/TGFB2/
						CCND1/HUS1/TRAF3IP2/PIK3CB/KRAS/ITPR3/CCND2/PIK3R2/RAD9A/
						MYBL2/HRAS/CDK2/CCNA2/CDC25A/CDKN2B/CDK1/E2F1/CCNE1/
						CCNB2/FOXM1/E2F5
ssc05022	Pathways of neurodegeneration - multiple diseases	146/2018	474/9028	1.2e-05	0.000208	COX3/ATP2A2/ND3/APP/SLC25A6/ND4L/ATF4/RB1CC1/ATP5F1E/SQSTM1/
						SDHA/FZD4/KIF5B/VDAC1/COX4I1/PINK1/DCTN2/MAP2K2/SLC25A4/
						ATP5PB/UQCRC1/CALM3/ATP2A3/ATP5F1D/ATP5F1C/PPP3CA/SOD1/
						LRRK2/PSMD3/ATP5MC2/SDHD/SPG11/PSMC3/DVL1/VAPB/PARK7/
						PSMA7/COX8A/PSMC5/CYC1/ATP5MC3/APC/DERL1/SLC25A5/PRKCB/
						RAF1/COX6A1/COX7A2L/COX7C/TUBB4B/PSMD13/HIP1/PSMB1/
						NDUFS8/BRAF/BCL2/GP91PHOX/COX6C/CAMK2D/ATG2B/LOC100523244/ UQCRQ/NDUFA10/ITPR1/NDUFV1/COX5B/NDUFS5/PSMC1/HSD17B10/
						ADRM1/PSMB7/NDUFAB1/PSMD8/NDUFS4/NDUFB10/ATXN1/NDUFB9/
						NDUFS7/COX6B/LOC100524873/SIGMAR1/NDUFV2/FZD5/PSMB5/
						ATP5PF/TRAP1/ATP5MC1/NDUFS3/PSMB6/UQCR10/NDUFB8/APAF1/
						MAPK8/PRKCA/NDUFV3/CASP8/PSMB3/ATXN3/NDUFA12/ALS2/
						NDUFA2/NDUFC2/NDUFA8/COX7A2/KRAS/ITPR3/DVL2/TOMM40/
						UQCRB/UBE2J2/NDUFB7/UBE2G2/NDUFB6/NDUFA13/FADD/NDUFC1/
						NDUFA11/NDUFA7/NDUFB11/WIPI1/NDUFA6/NDUFB2/FIG4/GNAI2/
						GNAQ/MAPT/CCS/NDUFS6/NDUFB3/DDIT3/PTGS2/HRAS/NDUFA1/
						WNT5B/HTRA2/BAX/COX7A1/GPX7/NDUFA3/AXIN2/BAD/NDUFB1/ATP8/ DNAH1/LOC100158003/LOC102157770
ssc04150	mTOR signaling pathway	57/2018	153/9028	1.82e-05	0.000286	RPS6/AKT2/LPIN1/FZD4/MAP2K2/CLIP1/IGF1/PRKAA2/PIK3CD/PTEN/
						RPS6KA3/PIK3CA/DVL1/SOS1/PDPK1/RICTOR/PRKCB/RAF1/BRAF/
						RHEB/ATP6V1A/AKT3/EIF4EBP1/LAMTOR1/FLCN/PRR5L/SEC13/IGF1R/
						FZD5/FNIP2/PRKAA1/AKT1S1/PRKCA/SLC38A9/LAMTOR5/PIK3CB/
						KRAS/IRS1/DVL2/ATP6V1F/CAB39L/PIK3R2/LAMTOR4/LAMTOR2/RPS6KB2/ CHUK/SESN2/WDR59/RRAGB/TBC1D7/HRAS/RNF152/WNT5B/
						DEPDC5/LPIN3/SKP2/ATP6V1G3
ssc03040	Spliceosome	48/2018	125/9028	3.33e-05	0.000499	SF3B1/PRPF8/HNRNPA1/SRSF10/SNRNP200/TRA2A/U2SURP/SRSF3/
						PRPF40A/THOC2/DDX46/PUF60/RBM25/PRPF6/SLU7/CRNKL1/SNRPD2/
						SMNDC1/DHX8/TCERG1/SART1/AQR/NCBP1/SNRPD3/LSM4/PRPF31/
						ALYREF/SNRPC/SRSF9/LSM6/SF3B5/PQBP1/SNRPG/BUD31/SNRPE/
						SNRPA/LSM2/RBM8A/LSM3/THOC3/TXNL4A/LSM8/SNRPF/MAGOH/
						PRPF40B/LSM7/LOC100739098/MAGOHB
ssc01521	EGFR tyrosine kinase inhibitor resistance	33/2018	78/9028	6.15e-05	0.000778	RPS6/JAK1/AKT2/MAP2K2/STAT3/NF1/IGF1/EGFR/PIK3CD/PTEN/AXL/
						PIK3CA/SOS1/PRKCB/RAF1/BRAF/BCL2/JAK2/AKT3/FGF2/EIF4EBP1/HGF/
						BCL2L11/IGF1R/PRKCA/PIK3CB/KRAS/PIK3R2/FGFR3/RPS6KB2/HRAS/
						BAX/BAD
ssc04115	p53 signaling pathway	31/2018	73/9028	9.36e-05	0.00114	CCNG1/THBS1/SESN3/IGF1/MDM4/PTEN/PMAIP1/ATM/BCL2/SIAH1/
						ZMAT3/CDK4/GADD45G/AIFM2/CD82/APAF1/ATR/RRM2/CCND1/CASP8/
						CCND2/SESN2/SIVA1/LOC100737977/CDK2/DDB2/BAX/CDK1/CCNE1/
						CCNB2/GTSE1
ssc04144	Endocytosis	79/2018	241/9028	0.000105	0.001194	SLA-3/CLTC/ACTR3/FOLR3/SLA-1/TGFBR2/PML/WIPF1/KIF5B/EPS15/
						PDCD6IP/SH3GLB1/WASHC4/ACAP2/AP2B1/CXCR2/CAPZA2/SNX6/IST1/
						EGFR/ARFGEF1/SLA6/IL2RG/ZFYVE16/TGFBR1/CAPZA1/IL2RB/EPN1/
						EHD4/USP8/LOC100522401/VPS4B/ASAP1/ARPC4/CLTA/ARAP3/EEA1/
						CXCR4/NEDD4/CBLB/RAB5C/SH3KBP1/ARFGAP2/TFRC/CHMP2A/CHMP3/
						RAB11FIP2/IGF1R/RUFY1/CCR5/CHMP1A/SNF8/ARFGAP1/VPS25/VPS4A/
						ARAP2/VPS37B/CLTB/SNX12/AGAP2/ARPC5L/ASAP2/PLD1/RAB11FIP3/
						CBL/CYTH4/WASHC1/PIP5K1C/FGFR3/ARF5/MVB12A/PRKCI/HRAS/
						CHMP6/DNM1/CHMP4A/DNM3/PRKCZ/PARD6B
ssc04910	Insulin signaling pathway	46/2018	136/9028	0.001341	0.009192	RPS6/PCK1/AKT2/RHOQ/HK3/PHKB/MAP2K2/PRKACB/SOCS3/CALM3/
						PPP1R3C/MKNK2/PRKAA2/PIK3CD/PPP1R3B/PIK3CA/SOS1/PDPK1/PCK2/
						RAF1/CBLB/BRAF/RHEB/AKT3/G6PC1/EIF4EBP1/GYS2/SOCS4/PRKAA1/
						PPP1R3D/MAPK8/PIK3CB/KRAS/IRS1/PRKAR2A/SOCS2/CBL/PIK3R2/
						PHKG2/RPS6KB2/PRKCI/HRAS/PKLR/GCK/BAD/PRKCZ
Note: The ID was the KEGG pathway ID; the description was the name of the pathway; the GeneRatio was the enriched gene number of corresponding pathway divided the total gene number of all enriched pathways; the BgRatio was the total gene number of corresponding pathway divided the total genes of all enriched pathways; P value was the statistical P value; P.adjust was the adjust P value; geneID wa…

## Sheet: Table S10
Supplementary Table S10: The KEGG enrichment of the DEGs from spleen tissue between WZS pigs and LW pigs
ID	Description	GeneRatio	BgRatio	pvalue	p.adjust	geneID
ssc05171	Coronavirus disease - COVID-19	129/2512	251/9028	1.08e-15	1.78e-13	RPL10/RPS2/RPLP1/RPL4/RPL6/RPS3A/RPL13A/RPS11/RPL7/RPSA/
						OAS2/RPL7A/RPS8/RPS20/RPL17/STAT1/RPS6/RPS7/RPS3/RPL23A/
						RPS15/RPL19/RPL3/RPL8/UBA52/RPS24/RPL13/RPS12/RPL18/RPS16/
						RPL32/RPL14/RPL29/RPS5/RPS10/IL6ST/RPS19/RPL31/RPLP2/RPL15/
						RPS9/RPL11/RPL27A/RPL35/RPL34/RPS26/RPL10A/RPS23/RPL26/
						RPL28/RPS14/JAK1/RPL18A/RPL12/RPS18/CXCL10/RPL30/C1QA/
						RPS15A/EIF2AK2/RPL23/RPS17/RPL21/RPL37A/RIGI/STAT2/RPL27
						/RPS13/RPL37/RPS25/RPL35A/RPL24/RPL38/RPS21/PIK3R1/MAPK14/
						CFD/RPL36/RPL22/RPS28/STAT3/IFIH1/RPS29/TAB2/MAPK1/C7/NRP1/
						C3AR1/IFNAR1/TLR8/EGFR/PIK3CA/NFKB1/RPL36A/MAPK9/IKBKG/
						RPL36AL/MAP3K7/GP91-PHOX/FAU/RPL22L1/ADAM17/TLR2/MAPK12/
						HBEGF/TLR7/RPS27L/IRF3/CASP1/TBK1/MAPK8/TRAF6/TLR3/MYD88/
						PIK3CB/RPL26L1/IRAK4/MASP2/CHUK/LOC110261249/LOC100519675/
						LOC100525692/MAPK11/LOC110260307/LOC100623540/MAPK13/IL1B/
						LOC100038328/IL12B
ssc05415	Diabetic cardiomyopathy	105/2512	205/9028	7.02e-13	5.77e-11	COL3A1/GAPDH/ND5/COL1A1/COL1A2/PDK4/ATP2A2/SLC25A6/ND4L/
						PPP1CB/AKT2/ATP5F1E/MPC1/TGFBR2/AKT1/PIK3R1/MAPK14/COX4I1/
						SLC25A4/LOC100511343/UQCRC1/ATP5F1D/GSK3B/GFPT1/ATP5MC2/
						PTEN/TGFBR1/PIK3CA/SP1/COX8A/COX7B/CYC1/NFKB1/ATP5MC3/
						TBC1D4/MAPK9/MTOR/COX6A1/COX7A2L/COX7C/PTPA/SLC2A4/PDK3/
						NDUFS8/GP91-PHOX/COX6C/CAMK2D/UQCRQ/NDUFA10/NDUFV1/
						COX5B/NDUFS5/NDUFAB1/SMAD3/NDUFS4/NDUFB10/NDUFB9/NDUFS7/
						COX6B/LOC100524873/PLN/ATP5PF/ATP5MC1/CYBA/MAPK12/NDUFS3/
						UQCR10/PPIF/NCF4/NDUFB8/TGFB2/MAPK8/NDUFV3/NDUFA12/PLCB1/
						NDUFA2/NDUFC2/PIK3CB/NDUFA8/COX7A2/UQCRB/NDUFB7/NDUFB6/
						NDUFA13/TGFB3/NDUFA11/NDUFA7/NDUFB11/CPT1B/NDUFA6/NDUFB2/
						NDUFS6/NDUFB3/PPARA/NDUFA1/RYR2/COX7A1/NDUFA3/NDUFB1/
						NDUFA4L2/MAPK11/COX4I2/ATP8/MAPK13/TNNI3
ssc05208	Chemical carcinogenesis - reactive oxygen species	113/2512	227/9028	1.09e-12	7.15e-11	ND5/CAT/SLC25A6/ND4L/AKT2/ATP5F1E/AKT1/PIK3R1/MAPK14/COX4I1/
						HMOX1/NFE2L2/PTPN11/SLC25A4/SOD2/FOXO3/MAPK1/HIF1A/UQCRC1/
						ATP5F1D/SOD1/EGFR/GSTO1/ATP5MC2/PTEN/PTPN1/PTPRJ/PIK3CA/
						COX8A/COX7B/SOS1/PDPK1/CYC1/NFKB1/ATP5MC3/MAPK9/RAF1/
						COX6A1/COX7A2L/COX7C/IKBKG/PRKD3/SOS2/AHR/NDUFS8/BRAF/
						COX6C/ARNT/UQCRQ/NDUFA10/NDUFV1/COX5B/NDUFS5/HGF/NDUFAB1/ CYP1B1/CYP1A2/NDUFS4/NDUFB10/NDUFB9/NDUFS7/COX6B/
						LOC100524873/ATP5PF/MET/ABL2/ATP5MC1/CYBA/MAPK12/ACP1/NDUFS3/ UQCR10/PPIF/NDUFB8/MAP3K5/MAPK8/NDUFV3/NDUFA12/NDUFA2/
						NDUFC2/
						PIK3CB/NDUFA8/COX7A2/KRAS/UQCRB/PLD1/NDUFB7/NDUFB6/
						NDUFA13/NDUFA11/NDUFA7/NDUFB11/NDUFA6/NDUFB2/CHUK/
						NDUFS6/NDUFB3/HRAS/PLD2/NDUFA1/COX7A1/NOX4/NDUFA3/BAD/
						PRKD1/NDUFB1/NDUFA4L2/MAPK11/COX4I2/ATP8/MAPK13/CYP2F1/
						GSTM3
ssc04714	Thermogenesis	111/2512	232/9028	4.22e-11	2.32e-09	ND5/ACSL1/RPS6/ND4L/ATP5F1E/ACSL4/MAPK14/COX4I1/PRKACB/
						ARID1A/UQCRC1/ATP5F1D/ATP5MC2/PRKAB2/RPS6KA3/COX8A/COX7B/
						SOS1/CYC1/CPT1A/ATP5MC3/MTOR/COX6A1/COX7A2L/KDM3B/COX7C/
						ATP5MG/KDM3A/SOS2/NDUFS8/ATF2/SLC25A29/COX6C/PRKAG2/UQCRQ/
						NDUFA10/CREB1/NDUFV1/COX5B/ARID1B/NDUFS5/NDUFAB1/NDUFS4/
						ATP5MF/NDUFB10/NDUFB9/NDUFS7/COX6B/LOC100524873/ATP5PF/
						ATP5MC1/MAPK12/NDUFS3/PRKAA1/AKT1S1/UQCR10/NDUFB8/MAP3K5/
						CREB3/SMARCB1/NDUFAF1/SMARCD3/COX17/NDUFV3/FRS2/PRKG1/
						NDUFA12/NDUFA2/COX19/NDUFC2/NDUFA8/COX7A2/KRAS/UQCRB/
						NDUFAF3/NDUFB7/NDUFB6/NDUFA13/COX15/NDUFA11/COA1/NDUFA7/
						NDUFB11/CPT1B/NDUFA6/NDUFB2/RPS6KB2/LOC100518575/NDUFS6/
						NDUFB3/PPARGC1A/HRAS/ATP5ME/NDUFA1/MLST8/COX7A1/NDUFA3/
						NDUFAF8/PRDM16/NDUFB1/NDUFA4L2/MAPK11/SIRT6/COX4I2/CPT1C/
						COA6/ATP8/COA4/MAPK13/COX16/NDUFAF2
ssc04068	FoxO signaling pathway	68/2512	130/9028	2.62e-09	8.62e-08	CAT/AKT2/SETD7/TNFSF10/TGFBR2/AKT1/PIK3R1/MAPK14/RBL2/
						STAT3/IRS2/SOD2/FOXO3/EP300/CREBBP/MAPK1/SGK2/BNIP3/STK4/
						PRMT1/EGFR/GABARAPL1/SMAD4/PTEN/PRKAB2/TGFBR1/FOXO1/
						PIK3CA/SOS1/PDPK1/ATM/HOMER1/MAPK9/RAF1/SLC2A4/SOS2/BRAF/
						PRKAG2/GADD45A/FOXO4/SMAD3/IGF1R/MAPK12/SIRT1/GADD45G/
						PRKAA1/TGFB2/MAPK8/PIK3CB/KRAS/CCND2/TGFB3/IL7R/
						LOC100521447/G6PC3/CHUK/CDKN2D/FBXO32/HRAS/CDK2/
						CDKN2B/PLK1/HOMER3/SKP2/MAPK11/FASLG/CCNB2/MAPK13
ssc00190	Oxidative phosphorylation	70/2512	137/9028	5.64e-09	1.6e-07	ND5/ND4L/ATP5F1E/COX4I1/UQCRC1/ATP5F1D/ATP5MC2/PPA1/
						COX8A/COX7B/CYC1/ATP5MC3/CYCS/COX6A1/COX7A2L/COX7C/
						ATP5MG/NDUFS8/COX6C/ATP6V1A/UQCRQ/NDUFA10/NDUFV1/
						ATP6V0A2/COX5B/NDUFS5/ATP6V0B/NDUFAB1/NDUFS4/ATP5MF/
						NDUFB10/NDUFB9/NDUFS7/COX6B/LOC100524873/ATP5PF/ATP5MC1/
						NDUFS3/UQCR10/NDUFB8/COX17/NDUFV3/NDUFA12/NDUFA2/
						NDUFC2/NDUFA8/COX7A2/UQCRB/NDUFB7/ATP6V1F/NDUFB6/
						NDUFA13/COX15/NDUFA11/LHPP/NDUFA7/NDUFB11/
						NDUFA6/NDUFB2/NDUFS6/NDUFB3/ATP5ME/NDUFA1/COX7A1/
						NDUFA3/NDUFB1/NDUFA4L2/COX4I2/ATP8/ATP6V1G3
ssc04932	Non-alcoholic fatty liver disease	78/2512	158/9028	5.83e-09	1.6e-07	ATF4/AKT2/AKT1/PIK3R1/ADIPOR2/MAPK14/COX4I1/IRS2/UQCRC1/
						GSK3B/PRKAB2/PIK3CA/COX8A/COX7B/CYC1/NFKB1/CYCS/MAPK9/
						COX6A1/COX7A2L/COX7C/NDUFS8/COX6C/PRKAG2/UQCRQ/TRAF2/
						NDUFA10/NDUFV1/COX5B/NDUFS5/NDUFAB1/NDUFS4/NDUFB10/
						NDUFB9/NDUFS7/COX6B/LOC100524873/MAPK12/NDUFS3/PRKAA1/
						UQCR10/NDUFB8/MAP3K5/MAPK8/NDUFV3/NDUFA12/NDUFA2/
						NDUFC2/PIK3CB/NDUFA8/COX7A2/UQCRB/NDUFB7/FAS/NDUFB6/
						NDUFA13/NDUFA11/NDUFA7/NDUFB11/CASP3/NDUFA6/NDUFB2/
						NDUFS6/NDUFB3/PPARA/DDIT3/NDUFA1/BAX/COX7A1/NDUFA3/
						NDUFB1/NDUFA4L2/MAPK11/FASLG/COX4I2/IL1A/MAPK13/IL1B
ssc04144	Endocytosis	107/2512	241/9028	1.82e-08	4.61e-07	SLA-3/ACTR2/ARPC1B/CLTC/ACTR3/FOLR3/SLA-1/TGFBR2/RAB10/BIN1/
						WIPF1/KIF5B/IGF2R/EPS15/PDCD6IP/WASHC4/ACAP2/WWP1/AP2B1/
						CXCR2/CAPZA2/SNX6/VPS35/IST1/EGFR/ARFGEF1/SLA6/ZFYVE16/
						TGFBR1/CAPZA1/SLA8/LOC100515345/EHD4/SNX2/RAB5A/USP8/
						LOC100522401/PDGFRA/VPS4B/ASAP1/ARPC4/CLTA/SPART/VPS26A/
						EEA1/CHMP4B/RAB5B/WASHC5/CHMP1B/ARRB2/ARFGEF2/NEDD4/
						CBLB/RAB5C/HGS/ARFGAP2/TFRC/SH3GLB2/CHMP2A/CHMP3/WASL/
						RAB11A/SMAD3/RAB11FIP2/IGF1R/RUFY1/CHMP1A/ACAP1/AP2S1/
						SNF8/ARFGAP1/VPS25/AGAP3/ARAP2/CYTH2/HSPA2/TRAF6/CLTB/
						NEDD4L/STAM/VPS37A/ARPC5L/ASAP2/PSD3/PLD1/RUFY2/CBL/
						RAB11FIP1/WASHC1/CHMP2B/FGFR3/ARF5/MVB12A/PRKCI/EHD3/
						ACAP3/HRAS/PLD2/CHMP6/CHMP4A/ACTR3B/WIPF3/GRK4/SLA-5/
						PARD6B/CHMP4C/PSD2
ssc04218	Cellular senescence	75/2512	154/9028	2.4e-08	5.64e-07	SLA-3/SLC25A6/PPP1CB/AKT2/SLA-1/ZFP36L2/TGFBR2/AKT1/HIPK3/
						PIK3R1/HIPK1/MAPK14/RBL2/CCND3/SLC25A4/FOXO3/PPP3R1/MAPK1/
						PPP3CB/CALM3/TRPM7/ITPR2/PPP3CA/SLA-6/PTEN/TGFBR1/FOXO1/
						PIK3CA/SLA-8/ATM/NFKB1/FBXW11/RAF1/MTOR/NFATC3/RAD50/
						GADD45A/HIPK2/RRAS/ITPR1/EIF4EBP1/CDK4/NBN/SMAD3/RB1/
						MAPK12/SIRT1/GADD45G/ATR/TGFB2/RBL1/HUS1/PIK3CB/KRAS/
						CCND2/TGFB3/LIN54/RAD9A/MYBL2/LIN37/HRAS/CDK2/NFATC4/
						CDC25A/CDKN2B/CHEK2/E2F1/MAPK11/SLA-5/CCNB2/IL1A/
						MAPK13/CALML4/FOXM1/HIPK4
ssc05014	Amyotrophic lateral sclerosis	145/2512	364/9028	2.95e-07	5.38e-06	ND5/CAT/ND4L/ATF4/PFN1/SETX/MATR3/RB1CC1/ATP5F1E/HNRNPA1/
						KIF5B/LOC100511376/MAPK14/COX4I1/UBQLN1/TPR/PPP3R1/UQCRC1/
						PPP3CB/ATP5F1D/PPP3CA/SOD1/NUP98/ATP5MC2/ATF6/SPG11/PSMC3/
						VAPB/NUP153/RAB5A/PSMA7/COX8A/PSMC5/COX7B/CYC1/PSMD12/
						ATP5MC3/FUS/CYCS/CHCHD10/ATXN2/MTOR/COX6A1/COX7A2L/COX7C/
						PSMD1/TUBB4B/PSMD13/PSMB1/NUP205/NDUFS8/BCL2/COX6C/ATG2B/
						UQCRQ/TRAF2/NDUFA10/NDUFV1/COX5B/NDUFS5/ADRM1/PSMB7/
						NDUFAB1/PSMD8/NDUFS4/NDUFB10/SEC13/NDUFB9/NDUFS7/COX6B/
						LOC100524873/SIGMAR1/PSMB5/ATP5PF/PIK3R4/ATP5MC1/BCL2L1/
						MAPK12/MAP1LC3A/NDUFS3/PSMB6/NUP155/UQCR10/NCBP1/NXT2/
						NDUFB8/NUP54/MAP3K5/APAF1/POM121C/CASP1/TBK1/NDUFV3/
						NUP160/ALYREF/PSMB3/HDAC6/NDUFA12/NDUFA2/NUP133/NDUFC2/
						NDUFA8/COX7A2/TOMM40/UQCRB/NDUFB7/NUP107/RAE1/NDUFB6/
						NDUFA13/NDUFA11/NDUFA7/CHMP2B/NDUFB11/ATG101/CASP3/
						NDUFA6/NDUFB2/FIG4/CCS/KLC4/NDUFS6/NDUFB3/NUP43/DDIT3/
						NDUFA1/KLC2/CASP9/NDC1/BAX/COX7A1/NDUFA3/LOC100624785/
						NXT1/BAD/NDUFB1/NDUFA4L2/NUP210L/MAPK11/COX4I2/
						ATP8/MAPK13/DNAH8/LOC100158003/DNAH6
ssc03013	Nucleocytoplasmic transport	54/2512	107/9028	5.18e-07	8.11e-06	IPO5/KPNB1/IPO7/LOC100511376/TNPO1/ACIN1/XPO1/TPR/TMEM33/
						KPNA3/KPNA4/AHCTF1/THOC2/CSE1L/NUP98/KPNA6/XPO5/SRRM1/
						SUMO2/NUP153/XPO7/NUP205/UBE2I/IPO8/SAP18/RANGAP1/SUMO3/
						SEC13/KPNA1/NUP155/NCBP1/NXT2/NUP54/POM121C/NUP160/
						ALYREF/NUP133/NMD3/NUP107/RAE1/KPNA5/NUP43/RBM8A/
						THOC3/NDC1/THOC6/RANBP17/NXT1/MAGOH/AAAS/PYM1/
						NUP210L/MAGOHB/UPF3A
ssc04010	MAPK signaling pathway	118/2512	289/9028	8.82e-07	1.32e-05	ATF4/AKT2/IGF2/TGFBR2/CACNA2D1/PAK2/AKT1/MAPK14/PRKACB/
						TAB2/PPP3R1/MAPK1/PPP3CB/NF1/STK4/PPM1A/CRK/MKNK2/ELK4/
						TAOK1/PPP3CA/EGFR/MAP3K2/RPS6KA3/TGFBR1/PDGFRA/SOS1/
						NFKB1/VEGFB/RAPGEF2/DUSP2/ARRB2/MAPK9/RAF1/MAP3K1/
						NFATC3/IKBKG/DUSP3/GNG12/PPM1B/SOS2/TEK/BRAF/MAP3K7/
						KITLG/ATF2/IL1RAP/GADD45A/DUSP4/TRAF2/RRAS/MAP3K20/
						MAP4K3/FGF2/GNA12/HGF/STMN1/MAP4K1/TAOK3/RASA2/IGF1R/
						RASA1/KIT/SRF/MET/MAPK12/GADD45G/EFNA1/MAP3K5/TAB1/
						PDGFC/TGFB2/HSPA2/MAPK8/TRAF6/PAK1/PLA2G4A/PPP5C/
						ECSIT/MYD88/STK3/KRAS/MAPK8IP3/TGFA/FAS/RPS6KA4/TGFB3/
						IRAK4/PTPN7/CASP3/FGFR3/MAPT/CHUK/ANGPT2/DDIT3/HRAS/
						TRADD/PLA2G4B/MAPK8IP1/RAC3/CACNA1C/MAPK11/FLT3/
						ANGPT1/MAP3K12/FASLG/CACNB3/IL1A/ANGPT4/MAPK13/IL1B/
						NGF/EFNA2/NTF3/CACNB4/CACNA2D2/PGF/MAPK8IP2
ssc04150	mTOR signaling pathway	70/2512	153/9028	1.4e-06	1.97e-05	RPS6/AKT2/LPIN1/AKT1/FZD4/PIK3R1/DDIT4/CLIP1/MAPK1/LPIN2/
						STRADB/LRP6/GSK3B/PTEN/RPS6KA3/PIK3CA/DVL1/DEPTOR/
						FNIP1/SOS1/PDPK1/RICTOR/RRAGC/RAF1/MTOR/SOS2/BRAF/
						DVL3/ATP6V1A/EIF4EBP1/LAMTOR1/FLCN/SEC13/IGF1R/FZD5/
						TELO2/FNIP2/PRKAA1/AKT1S1/SLC38A9/CASTOR2/LAMTOR5/
						PIK3CB/KRAS/DVL2/MIOS/ATP6V1F/WDR24/RRAGD/FZD8/
						LAMTOR4/LAMTOR2/RPS6KB2/NPRL2/CHUK/TBC1D7/PRR5
						/HRAS/RNF152/WNT5B/FZD6/LPIN3/MLST8/SKP2/WNT9A/
						FZD3/WNT2/WNT2B/WNT10B/ATP6V1G3
ssc04660	T cell receptor signaling pathway	51/2512	108/9028	1.25e-05	0.000146	PTPRC/AKT2/PAK2/AKT1/PIK3R1/MAPK14/PPP3R1/MAPK1/PTPN6/
						PPP3CB/CD247/PPP3CA/LCP2/GSK3B/PIK3CA/DLG1/SOS1/PDPK1/
						NFKB1/MAPK9/RAF1/NFATC3/IKBKG/SOS2/CBLB/MAP3K7/ITK/
						CDK4/ZAP70/MALT1/NCK1/MAPK12/CARD11/VAV3/VAV2/CD3D/
						MAPK8/PAK1/PIK3CB/KRAS/BCL10/CHUK/HRAS/GRAP2/LOC100621559/
						MAPK11/CD28/PDCD1/MAPK13/IFNG/LOC100620407
Note: The ID was the KEGG pathway ID; the description was the name of the pathway; the GeneRatio was the enriched gene number of corresponding pathway divided the total gene number of all enriched pathways; the BgRatio was the total gene number of corresponding pathway divided the total genes of all enriched pathways; P value was the statistical P value; P.adjust was the adjust P value; geneID wa…

[truncated: 3 more sheets: Table S11, Table S12, Table S13]
